# Supplementary material
Source: bioRxiv or medRxiv preprint supplement (https://www.biorxiv.org/highwire/filestream/2638/field_highwire_adjunct_files/0/010546-1.pdf)
Supplement: Supplementary file [file 010546-1.pdf]

## Supplementary Materials

### Transcriptome Sequencing Reveals Widespread Gene-Gene and Gene-Environment Interactions

Alfonso Buil<sup>1,2,3,\*</sup>, Andrew A Brown<sup>4</sup>, Tuuli Lappalainen<sup>1,2,3,5</sup>, Ana Viñuela<sup>6</sup>, Matthew N. Davies<sup>6</sup>, H.F. Zheng<sup>7</sup>, J.B. Richards<sup>6,7</sup>, Kerrin S. Small<sup>6</sup>, Richard Durbin<sup>5</sup>, Timothy D. Spector<sup>6</sup>, Emmanouil T. Dermitzakis<sup>1,2,3,\*</sup>

Supplementary Figure 1. ASE models. A) Basic model of ASE: genetic variants in cis or epigenetic modifications cause a difference in the expression of the haplotypes. B) GxG effects of ASE: the effect on ASE of the genetic variants in cis depends on the genotype of a locus in trans. C) GxE effects on ASE: the magnitude of the ASE caused by genetic variants in cis depends on the effect of an environmental factor.

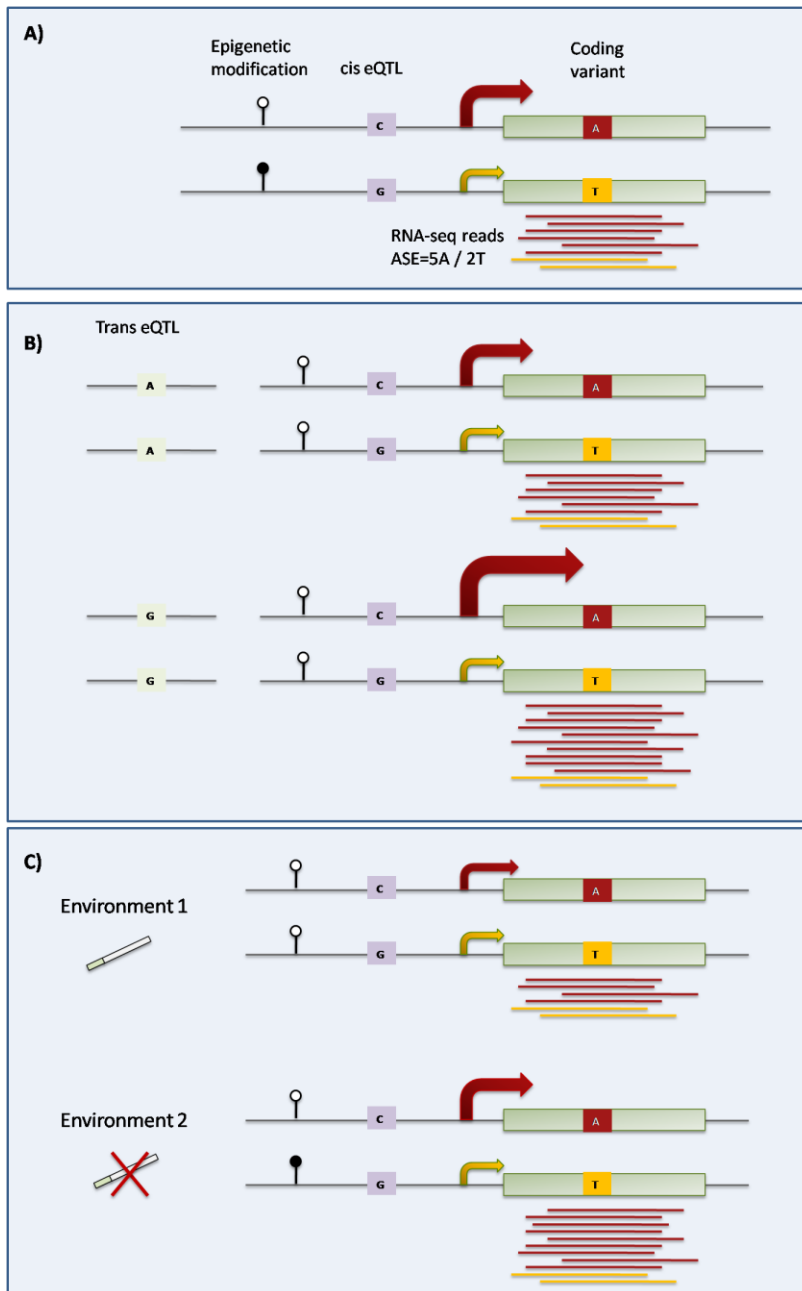

Supplementary Figure 2. Variance components of ASE: 'H2' (equal to eqtl + cis + trans) is the heritability of ASE, 'eqtl' is the proportion of variance explained by a common eQTL, 'cis' is the proportion of variance explained by other variants in cis, 'trans' is the proportion of variance explained by genetic variants in trans, 'c' is the proportion of variance explained by the shared environment and 'e' is the proportion of variance explained by the individual environment. The 95% confidence intervals were calculated using 1000 bootstrap permutations.

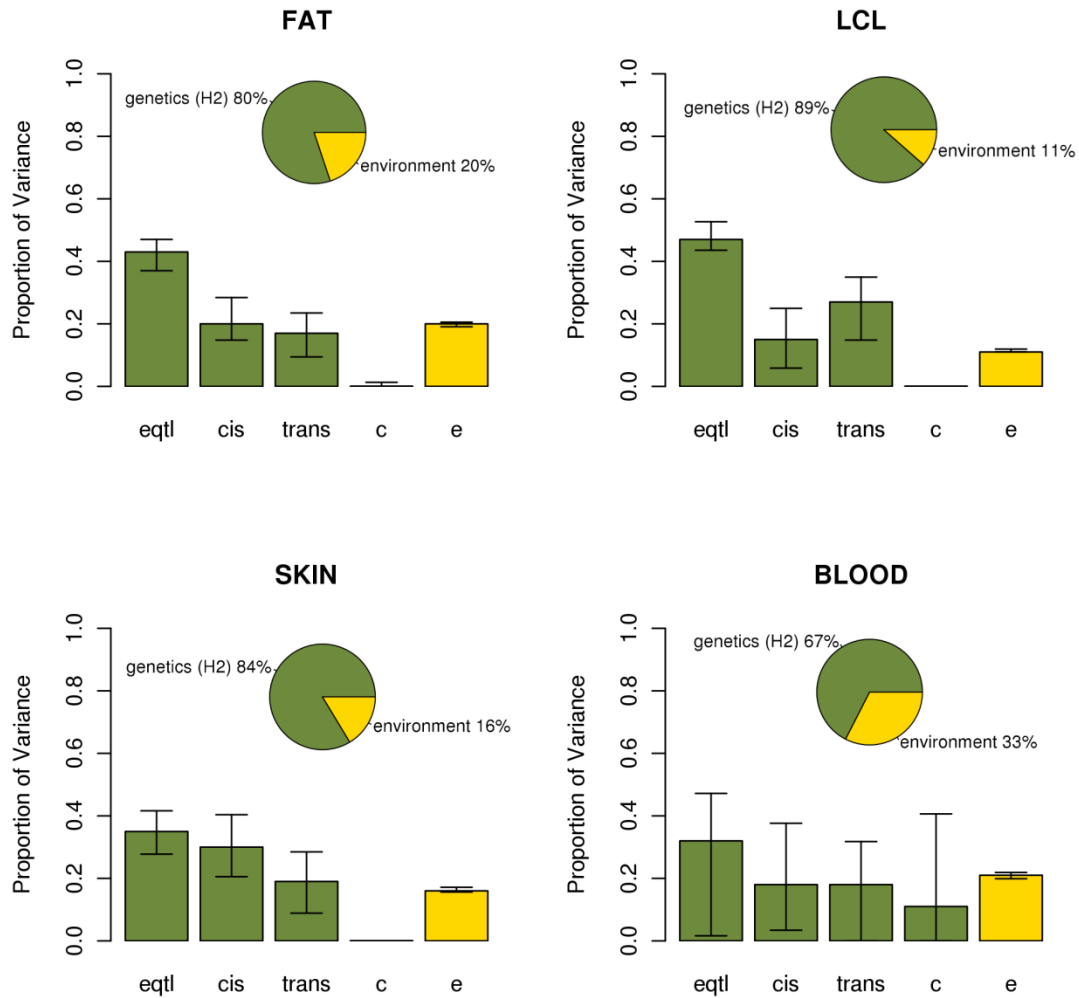

Supplementary Table 1. Results of MZ twins discordant analysis in Fat: 'snpASE' is the SNP in which we measured ASE, 'snpAssoc' is the SNP that shows the association, 'p' is the raw p value of the test, 'p\_adj' is the adjusted p value taking into account the number of tests, 'gene' is the name of the analyzed gene.

| snpASE     | snpAssoc    | p       | p_adj   | gene    |                                                  |
|------------|-------------|---------|---------|---------|--------------------------------------------------|
| rs8086     | rs34710824  | 3.6e-06 | 0.00089 | ACSL1   | acyl-CoA synthetase long-chain family member 1   |
| rs4686804  | rs4686817   | 4.4e-06 | 0.0011  | ADIPOQ  | adiponectin, C1Q and collagen domain containing  |
| rs3185480  | rs1940232   | 4.8e-06 | 0.0012  | APCDD1  | adenomatosis polyposis coli down-regulated 1     |
| rs35880596 | rs11230908  | 8.4e-06 | 0.0021  | EML3    | echinoderm microtubule associated protein like 3 |
| rs487098   | rs10447415  | 1.3e-05 | 0.0033  | SERINC1 | serine incorporator 1                            |
| rs1059288  | rs28383423  | 1.7e-05 | 0.0043  | TAPBP   | TAP binding protein (tapasin)                    |
| rs1129448  | rs5756639   | 2.1e-05 | 0.0054  | TRIOBP  | TRIO and F-actin binding protein                 |
| rs2257269  | rs116714571 | 2.4e-05 | 0.0059  | HLA-B   | major histocompatibility complex, class I, B     |
| rs7473     | rs2477202   | 2.5e-05 | 0.0063  | LAMC1   | laminin, gamma 1                                 |
| rs3821083  | rs12185692  | 2.6e-05 | 0.0066  | CYBRD1  | cytochrome b reductase 1                         |
| rs1801214  | rs12645004  | 2.8e-05 | 0.007   | WFS1    | Wolfram syndrome 1 (wolframin)                   |
| rs7612     | rs2942558   | 3.3e-05 | 0.0082  | ACTB    | actin, beta                                      |
| rs1043943  | rs7648762   | 3.4e-05 | 0.0085  | TMEM43  | transmembrane protein 43                         |
| rs8130574  | rs11702317  | 3.7e-05 | 0.0092  | PDXK    | pyridoxal (pyridoxine, vitamin B6) kinase        |
| rs3206576  | rs58617429  | 4e-05   | 0.01    | TBC1D16 | TBC1 domain family, member 16                    |

Supplementary Table 2. Results of MZ twins discordant analysis in LCLs: 'snpASE' is the SNP in which we measured ASE, 'snpAssoc' is the SNP that shows the association, 'p' is the raw p value of the test, 'p\_adj' is the adjusted p value taking into account the number of tests, 'gene' is the name of the analyzed gene.

| snpASE     | snpAssoc   | p       | p_adj   | gene     |                                                              |
|------------|------------|---------|---------|----------|--------------------------------------------------------------|
| rs9919     | rs4394929  | 5.1e-07 | 0.00013 | EIF2B1   | eukaryotic translation initiation factor 2B, subunit 1 alpha |
| rs348389   | rs12710084 | 1.2e-06 | 3e-04   | TNFSF9   | tumor necrosis factor (ligand) superfamily, member 9         |
| rs1803382  | rs9935402  | 5.1e-06 | 0.0013  | PIEZO1   | piezo-type mechanosensitive ion channel component 1          |
| rs34653729 | rs10760665 | 1.5e-05 | 0.0037  | FNBP1    | formin binding protein 1                                     |
| rs4905     | rs67782188 | 1.5e-05 | 0.0037  | EBI3     | Epstein-Barr virus induced 3                                 |
| rs9038     | rs56146203 | 1.6e-05 | 0.0039  | SEPT9    | septin 9                                                     |
| rs1545837  | rs75371758 | 1.7e-05 | 0.0044  | KIAA1967 |                                                              |
| rs11136344 | rs57665959 | 2.1e-05 | 0.0052  | PARP10   | poly (ADP-ribose) polymerase family, member 10               |
| rs7612     | rs28508548 | 2.4e-05 | 0.0061  | ACTB     | actin, beta                                                  |
| rs11115    | rs76286165 | 2.6e-05 | 0.0066  | MRPL4    | mitochondrial ribosomal protein L4                           |
| rs241448   | rs2856997  | 3e-05   | 0.0076  | TAP2     | transporter 2, ATP-binding cassette, sub-family B            |
| rs836      | rs7515302  | 3e-05   | 0.0074  | F11R     | F11 receptor                                                 |
| rs9616     | rs10908452 | 3e-05   | 0.0076  | ADAR     | adenosine deaminase, RNA-specific                            |
| rs4937333  | rs66726214 | 3.2e-05 | 0.008   | ETS1     | v-etserythroblastosis virus E26 oncogene homolog 1 (avian)   |
| rs699517   | rs12954127 | 3.2e-05 | 0.008   | ENOSF1   | enolase superfamily member 1                                 |
| rs699517   | rs12954127 | 3.2e-05 | 0.008   | TYMS     | thymidylatesynthetase                                        |
| rs1057902  | rs8064938  | 3.8e-05 | 0.0094  | UBE2Z    | ubiquitin-conjugating enzyme E2Z                             |
| rs11609    | rs6496760  | 3.8e-05 | 0.0096  | IQGAP1   | IQ motif containing GTPase activating protein 1              |
| rs660339   | rs4121668  | 3.8e-05 | 0.0095  | UCP2     | uncoupling protein 2 (mitochondrial, proton carrier)         |
| rs1049961  | rs6583964  | 3.9e-05 | 0.0097  | PDLIM1   | PDZ and LIM domain 1                                         |

Supplementary Table 3. Results of MZ twins discordant analysis in Skin: 'snpASE' is the SNP in which we measured ASE, 'snpAssoc' is the SNP that shows the association, 'p' is the raw p value of the test, 'p\_adj' is the adjusted p value taking into account the number of tests, 'gene' is the name of the analyzed gene.

| snpASE    | snpAssoc    | p       | p_adj  | gene   |                                              |
|-----------|-------------|---------|--------|--------|----------------------------------------------|
| rs3185480 | rs62078925  | 1e-05   | 0.0026 | APCDD1 | adenomatosis polyposis coli down-regulated 1 |
| rs7734    | rs61063076  | 2.3e-05 | 0.0058 | GLUL   | glutamate-ammonia ligase                     |
| rs7018    | rs6036766   | 2.5e-05 | 0.0061 | PYGB   | phosphorylase, glycogen;                     |
| rs1131264 | rs145607607 | 3.8e-05 | 0.0094 | FLNB   | filamin B, beta                              |

Supplementary Table 4. Results of MZ twins discordant analysis in Blood: 'snpASE' is the SNP in which we measured ASE, 'snpAssoc' is the SNP that shows the association, 'p' is the raw p value of the test, 'p\_adj' is the adjusted p value taking into account the number of tests, 'gene' is the name of the analyzed gene.

| snpASE    | snpAssoc | p       | p_adj  | gene    |                 |
|-----------|----------|---------|--------|---------|-----------------|
| rs1044059 | rs204293 | 2.9e-05 | 0.0072 | RNASET2 | ribonuclease T2 |
